# Supplementary material for: Enhanced Anxiety and Olfactory Microglial Activation in Early-Stage Familial Alzheimer’s Disease Mouse Model
Source: MDPI journal article supplement (doi:10.3390/biology11060938), 2022-06-20

Article

# Enhanced anxiety and olfactory microglial activation in early-stage familial Alzheimer's disease mouse model

Keerthana Chithanathan<sup>1</sup>, Fang-Ling Xuan<sup>1</sup>, Miriam Ann Hickey<sup>2</sup> and Li Tian<sup>1\*</sup>

Supplementary table S1. Primers designed for *IL1b*, *IL18*, *Tnf* and *GAPDH* genes for expression studies in mice.

| Gene name    | Primer Sequence 5'-3' |                          |
|--------------|-----------------------|--------------------------|
| <i>Il1b</i>  | Forward               | AGCTTCCTTGTGCAAGTGTCT    |
|              | Reverse               | TGGGGTCCGTCAACTTCAAA     |
| <i>Il18</i>  | Forward               | TCAAAGTGCCAGTGAACCCC     |
|              | Reverse               | GGTCACAGCCAGTCCTCTTAC    |
| <i>Tnf</i>   | Forward               | ATGGCCTCCCTCTCATCAGT     |
|              | Reverse               | TTTGCTACGACGTGGGCTAC     |
| <i>Gapdh</i> | Forward               | GTCATATTTCTCGTGGTTCACACC |
|              | Reverse               | CTGAGTATGTCGTGGAGTCTACTG |

Supplementary figure S1.

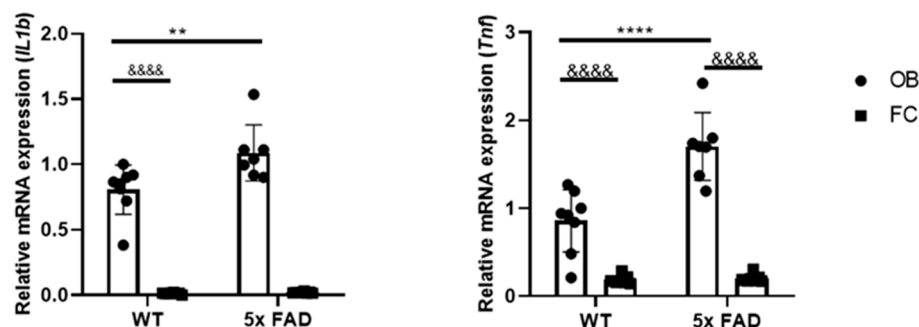

**Supplementary figure S1. Higher level of pro-inflammatory cytokines in the OB and their increases in 2-mo 5x FAD male mice.** Enhanced gene expression of *Il1b* and *Tnf* as measured by qPCR was seen in the OB compared to the FC; *Il1b* and *Tnf* were also more abundant in the OB of 5x FAD mice than WT littermates ( $n = 7-8$ ). Data expressed as mean  $\pm$  SEM; \* symbolizes significant genotypic difference while & regional difference; \*\*  $p < 0.01$ , &&&  $p < 0.001$ , \*\*\*\* &&&&  $p < 0.0001$  (two-way ANOVA with Tukey's test).

**Supplementary figure S2. Representative dot plots of isotype controls used in flow cytometric analysis.**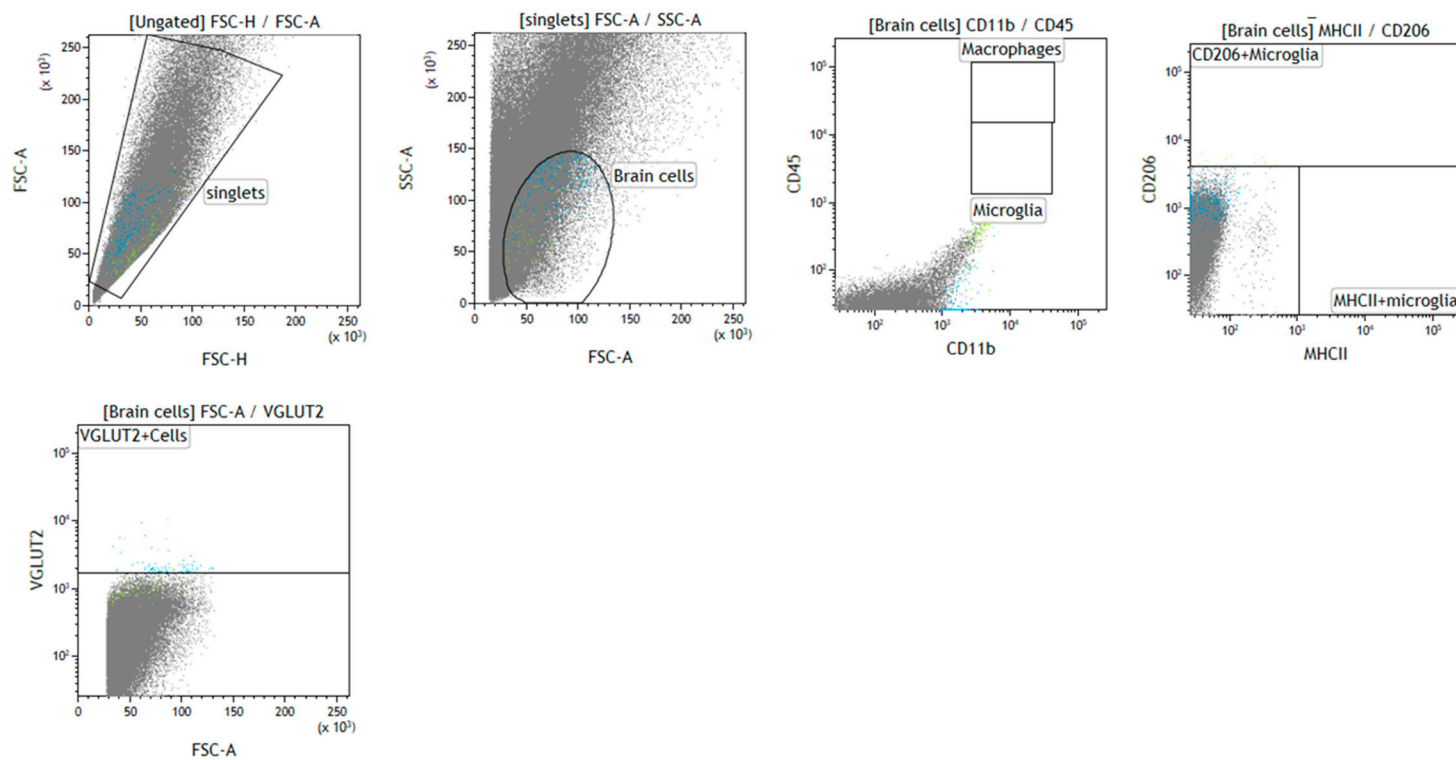

Supplement: s1 [file s1]
